# Supplementary material for: Ma Huang Tang Suppresses the Production and Expression of Inflammatory Chemokines via Downregulating STAT1 Phosphorylation in HaCaT Keratinocytes
Source: PubMed Central journal article supplement (PMC5101387; doi:10.1155/2016/7831291), 2016-10-26
Supplement: 7831291.f1.pdf [file 7831291.f1.pdf]

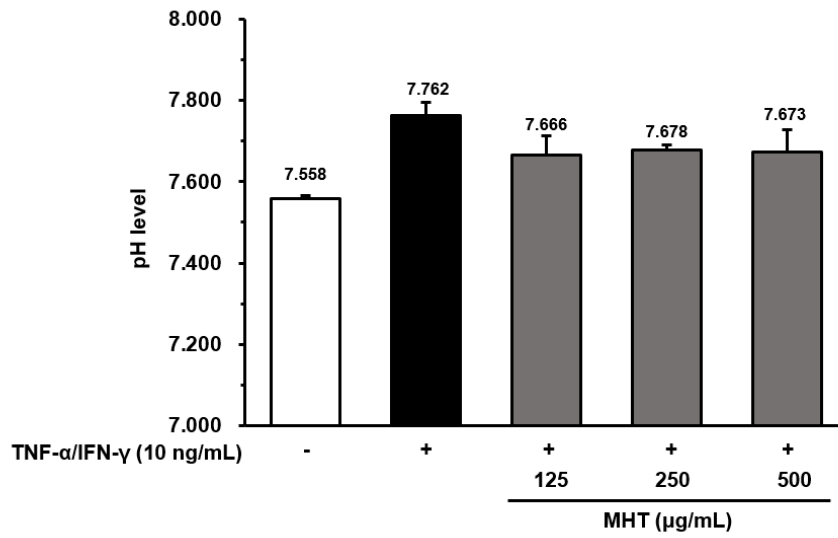

Supplementary Figure 1. Effects of pH level on MHT in TNF- $\alpha$  and IFN- $\gamma$ -stimulated HaCaT cells. Cells were seeded onto 6-well plates and treated with various concentrations of MHT (125, 250, or 500  $\mu\text{g/mL}$ ) with TNF- $\alpha$  and IFN- $\gamma$  (each 10 ng/mL) for 24 h. The values are expressed as the mean  $\pm$  SEM of three independent experiments.
